# Supplementary material for: Real-world monitoring of BNT162b2 vaccine-induced SARS-CoV-2 B and T cell immunity in naive healthcare workers: a prospective single center study
Source: bioRxiv or medRxiv preprint supplement (doi:10.1101/2022.01.17.22269081), 2022-01-17
Supplement: Supplementary file [file media-1.pdf]

## Supplementary Material

### 1 Supplementary Figures and Tables

#### 1.1 Supplementary Figures

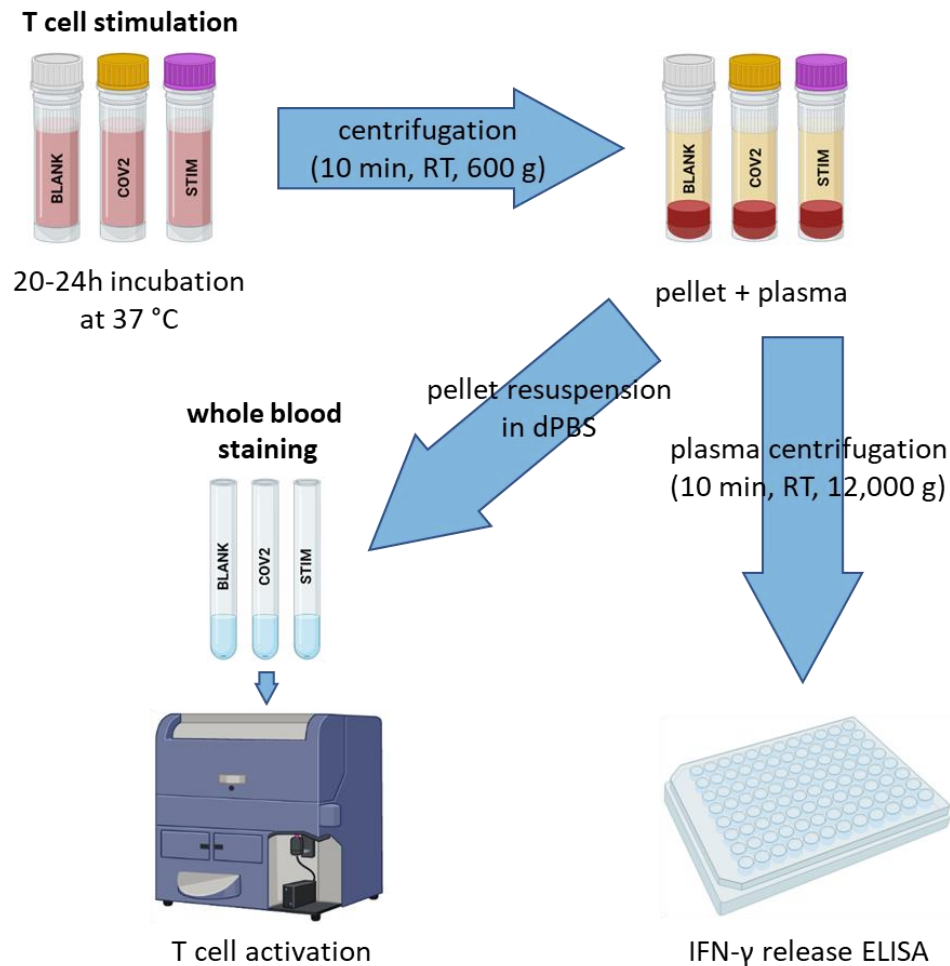

**Supplementary Figure 1. Graphic representation of the secondary read-out procedure to determine SARS-CoV-2 specific T cell activity.** Whereas the plasma was used to determine SARS-CoV-2-specific IFN- $\gamma$  release via the commercial Quant-T-Cell ELISA (EUROIMMUN, no. EQ 6841-9601), the remaining pellets within the IGRA tubes (BLANK, COV2, STIM) of the SARS-CoV-2 IGRA set (EUROIMMUN, no. ET 2606-3003) were resuspended and stained via a whole-blood principle to assess SARS-CoV-2-specific T cell activity. Abbreviations: RT = room temperature, IFN- $\gamma$  = interferon  $\gamma$ , ELISA = enzyme-linked immunosorbent assay, IGRA = interferon  $\gamma$  release assay.

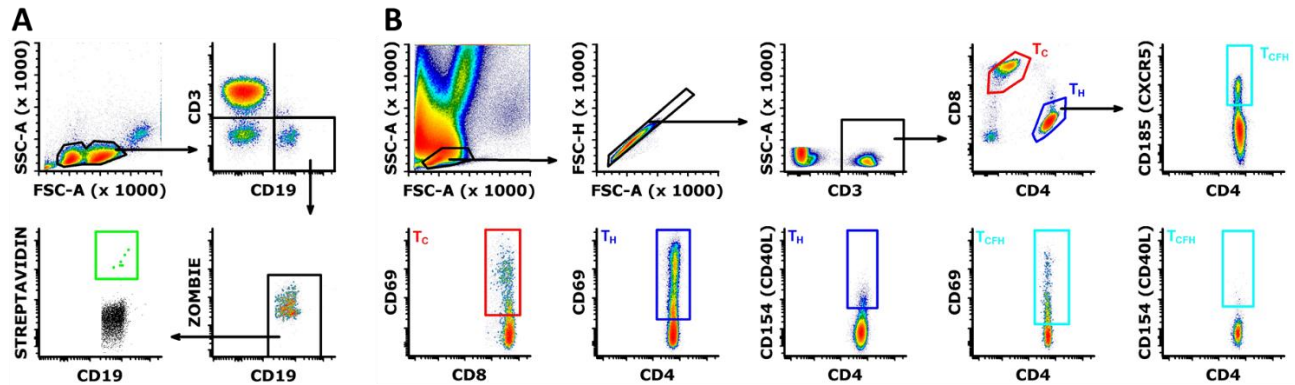

**Supplementary Figure 2. Flowcytometric B and T cell profiling.** **A)** Gating strategy used to detect circulating RBD specific B cells from thawed PBMCs. **B)** Gating strategy used to define the different T cell subsets (T<sub>H</sub>, T<sub>c</sub> and T<sub>CFH</sub>) and to assess T cell activity using both CD69 and CD40L membrane markers from whole blood. Abbreviations: RBD = receptor-binding domain, PBMCs = peripheral blood mononuclear cells.

## 1.2 Supplementary Tables

**Supplementary Table 1. B and T cell staining panel used for flowcytometric phenotyping.**

| Marker                 | Fluorochrome         | Clone  | Quantity/test              | Company   |
|------------------------|----------------------|--------|----------------------------|-----------|
| <i>B cell panel *</i>  |                      |        |                            |           |
| CD3                    | FITC                 | UCHT1  | 1:1000 dilution            | Biolegend |
| CD19                   | Per-CP/Cy5.5         | HIB19  | 1:400 dilution             | Biolegend |
| Streptavidin           | PE                   | NA     | 1:1000 dilution            | Biolegend |
| Zombie                 | Aqua                 | NA     | 1:1000 dilution            | Biolegend |
| <i>T cell panel **</i> |                      |        |                            |           |
| CD3                    | FITC                 | UCHT1  | 5 $\mu$ L / 100 $\mu$ L WB | Biolegend |
| CD4                    | Pacific Blue         | SK3    | 5 $\mu$ L / test on WB     | Biolegend |
| CD8                    | Brilliant Violet 510 | RPA-T8 | 5 $\mu$ L / 100 $\mu$ L WB | Biolegend |
| CXCR5<br>(CD185)       | PE/Cy7               | J252D4 | 5 $\mu$ L / 100 $\mu$ L WB | Biolegend |
| CD40L<br>(CD154)       | PE                   | 24-31  | 5 $\mu$ L / 100 $\mu$ L WB | Biolegend |
| CD69                   | APC                  | FN50   | 5 $\mu$ L / 100 $\mu$ L WB | Biolegend |

\* B cell staining panel: quantity/test based on one million PBMCs per tube. \*\* T cell staining panel: quantity/test values represent those used to perform a whole blood staining. Abbreviations: NA = not applicable, WB = whole blood, PBMC = peripheral blood mononuclear cells.
